# Supplementary material for: Preclinical and randomized phase I studies of plitidepsin in adults hospitalized with COVID-19
Source: Life Sci Alliance. 2022 Jan 10;5(4):e202101200. doi: 10.26508/lsa.202101200 (PMC8761492; doi:10.26508/lsa.202101200)
Supplement: Supplementary file 8 [file LSA-2021-01200_TableS6.xlsx]

## Sheet: Hoja1
Endpoint from day 1 to		Mild		Moderate		Severe
		(N=6)		(N=23)		(N=15)
		N	%	N	%	N	%
Patients requiring invasive mechanical ventilation and/or ICU admission at, n (%)	Day 7	.	.	.	.	5	33.3
	Day 15	.	.	.	.	6	40
	Day 31	.	.	.	.	6	40
Patients requiring non-invasive mechanical ventilation at, n (%)	Day 7	.	.	1	4.3	4	26.7
	Day 15	.	.	1	4.3	6	40
	Day 31	.	.	1	4.3	7	46.7
Patients requiring ICU admission at, n (%)	Day 7	.	.	.	.	5	33.3
	Day 15	.	.	.	.	6	40
	Day 31	.	.	.	.	6	40
Patients requiring oxygen therapy at, n (%)	Day 7	2	33.3	18	78.3	15	100
	Day 15	2	33.3	18	78.3	15	100
	Day 31	2	33.3	18	78.3	15	100
Patients requiring oxygen therapy (high flow) at, n (%)	Day 7	.	.	1	4.3	4	26.7
	Day 15	.	.	1	4.3	6	40
	Day 31	.	.	1	4.3	6	40
Patients requiring oxygen therapy (low flow) at, n (%)	Day 7	2	33.3	18	78.3	15	100
	Day 15	2	33.3	18	78.3	15	100
	Day 31	2	33.3	18	78.3	15	100
Patients requiring invasive mechanical ventilation at, n (%)	Day 15	.	.	.	.	2	13.3
	Day 31	.	.	.	.	3	20
Deaths at, n (%)	Day 31	.	.	.	.	2	13.3
Table S6. Summary of Protocol-Specified Efficacy Endpoints, by disease severity at baseline. *
* Analysis performed in all 44 patients who completed therapy.
